# Supplementary material
Source: PubMed Central journal article supplement (PMC5576570)
Supplement: NIHMS899343-supplement-6.pdf [file NIHMS899343-supplement-6.pdf]

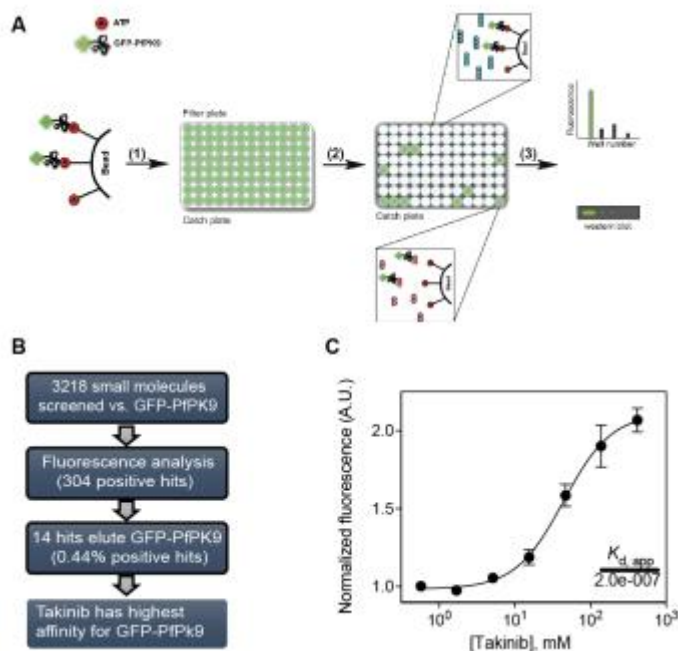

**Figure S1.** Identification of Takinib as an inhibitor of PfPK9 related to Figure 1. **A** Screening strategy for ATP pull-down assay. (1) ATP bound sepharose beads were incubated with cell lysate containing GFP-PfPK9. Following incubation, the charged ATP beads were dispensed into 96-well filter plates. (2) Small-molecules or ATP solutions were added to each well of 96-well filter plates. The plates were then incubated at room temperature and centrifuged to collect the eluates in the catch plate. (3) First, the fluorescence intensity of each eluate was measured using an Envision imager system. Next, each eluate with high fluorescence intensity ( $\geq 2$ -fold background fluorescence) was Western blotted for GFP-PfPK9 to confirm for hit selection. **B** Summary of screening results. **C** Affinity of Takinib for PfPK9 as determined in ATP pull-down assay.  $K_{d,app}$  calculated based on previous work(Haystead, 2006).

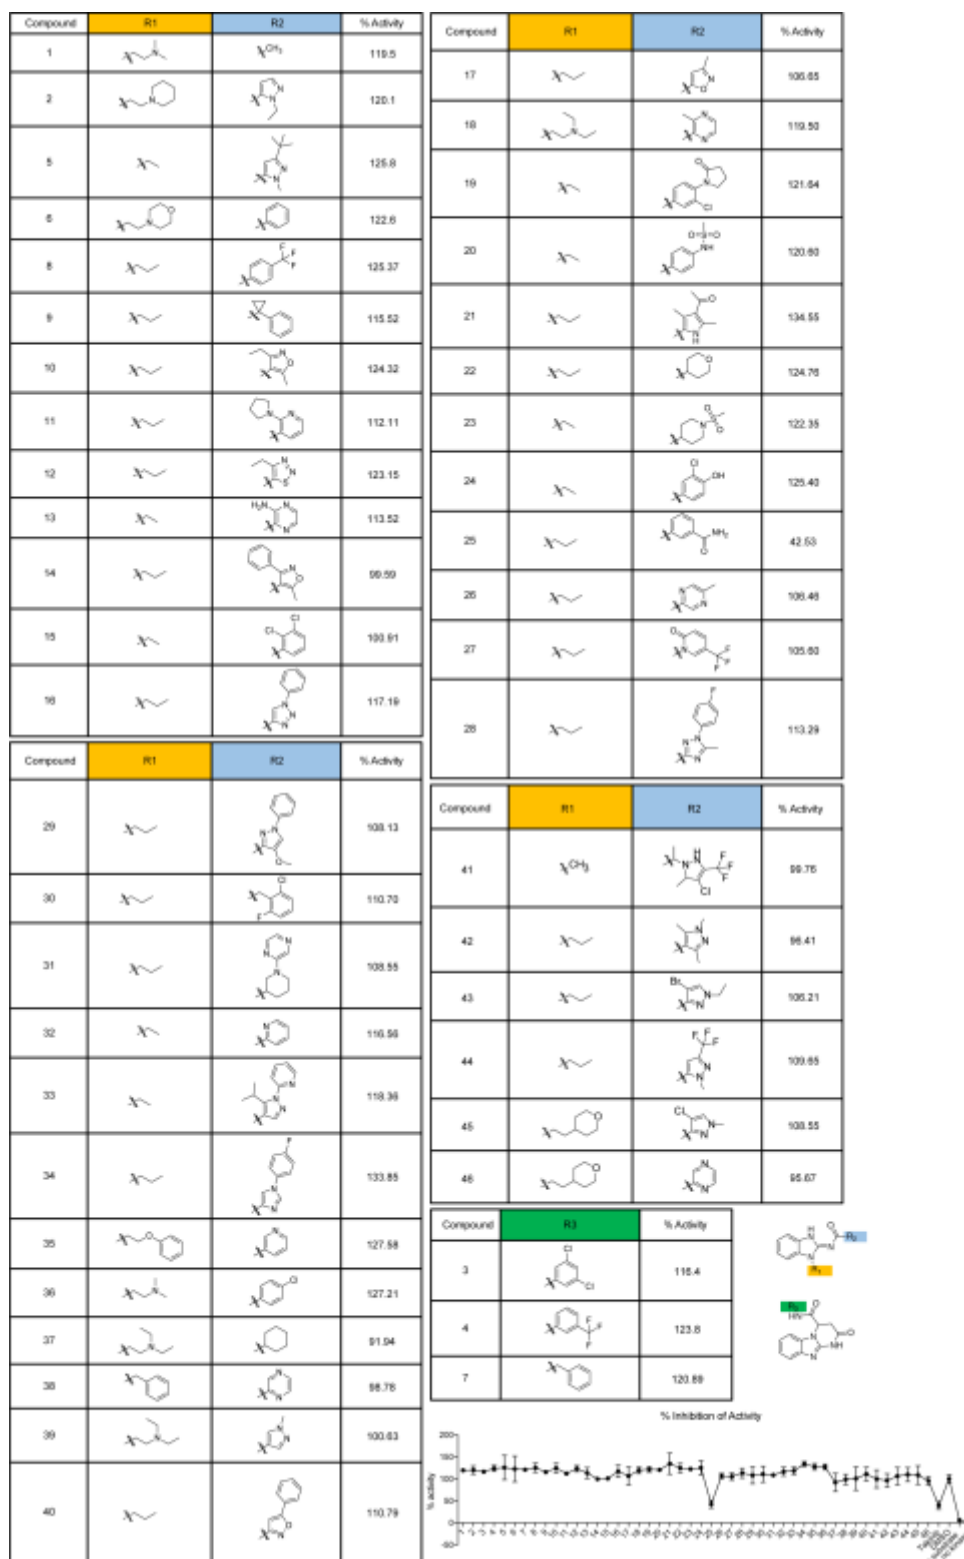

**Figure S2.** Structure-Activity Relationship Studies with Takinib and aminobenzimidazole containing analogs related to Figure 3. Table demonstrates analogs with graphical representation of results shown below. Analogues were taken from the Haystead library and numbers assigned by PFH. Experimenter JT was blinded for the kinase assay.

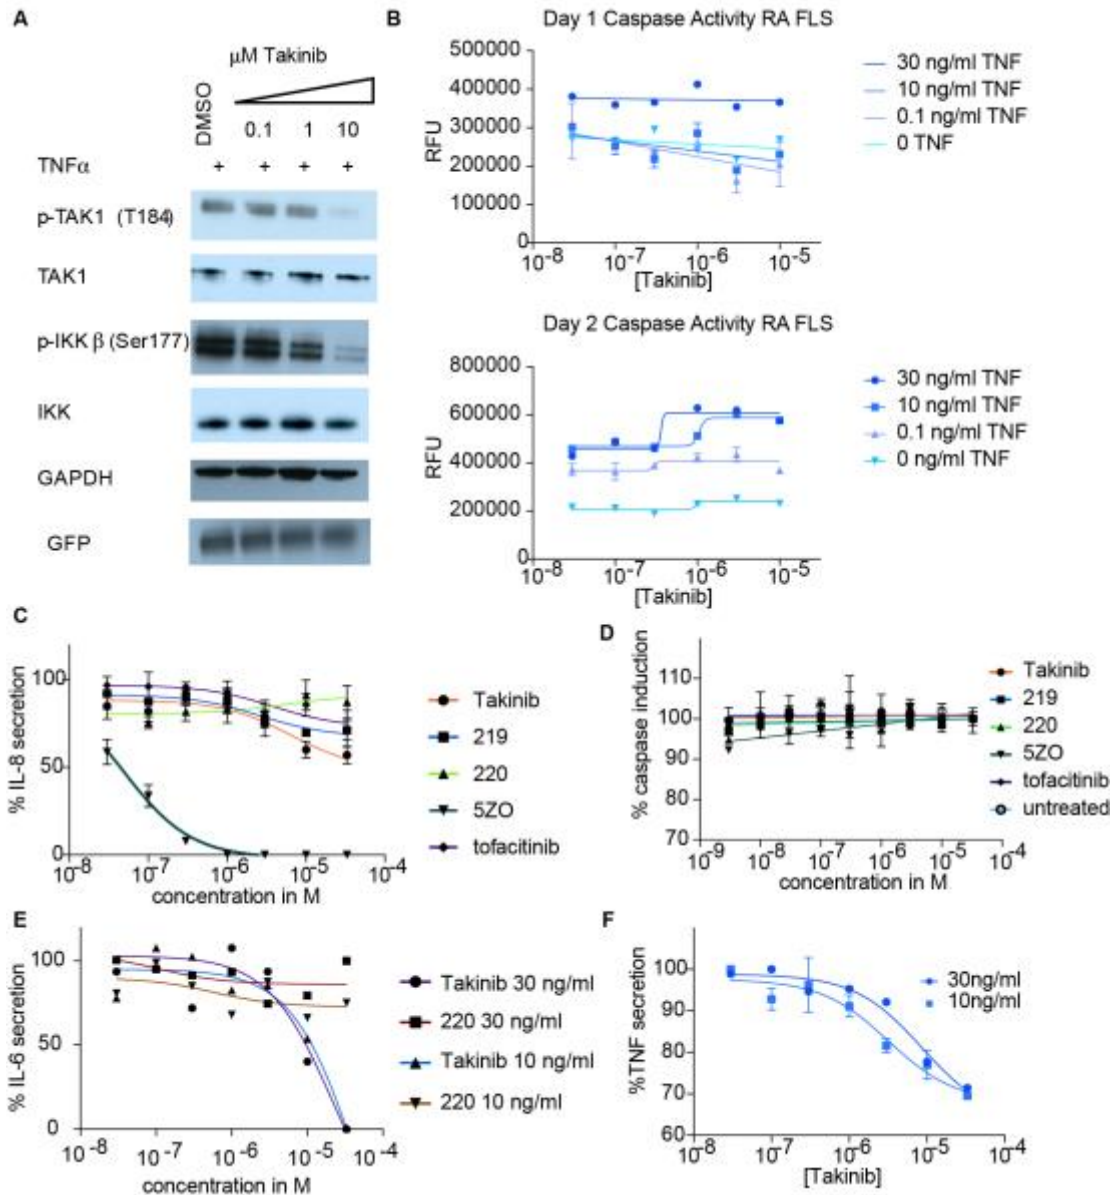

**Figure S3.** Additional Studies with RA FLS and cancer cells related to Figure 5, 6. **A** Caspase induction of RA FLS cells was measured after 24h treatment with Takinib compounds and TNF stimulation (n=4, mean±SEM). **B** As in **A**, but cells were treated for 48h (n=4, mean±SEM). **C** Caspase induction measured after 24h in the presence of TNF, cells treated with indicated compounds (n=4, mean±SEM). **D** IL-6 secretion was measured in the presence of different concentrations of TNF and Takinib /220 (n=2, mean±SEM). **E** IL8 secretion of cells treated with indicated compounds and TNF. Secretion was measured by performing ELISA (n=2, mean±SEM). **F** TNF secretion was measured after cells were stimulated with TNF in the presence of compounds. After 24h, media was changed to contain only compound. ELISA was used to measured TNF release of RA FLS (n=2, mean±SEM).

|                 | CATALYTIC SITE |                                                                     | HYDROPHOBIC INTERACTIONS AND HINGE REGION |                          |     |                            |
|-----------------|----------------|---------------------------------------------------------------------|-------------------------------------------|--------------------------|-----|----------------------------|
| IRAK1           | 231            | RNTVYA--VRLKENA                                                     | 217                                       | KIGEGGF <sup>A</sup> GCV | 288 | VYGFLP <sup>B</sup> NGSLED |
| IRAK4           | 206            | NNTTVA--VKKLAAMV                                                    | 191                                       | KMGE <sup>B</sup> GGFGVV | 261 | VYVYMP <sup>B</sup> NGSLLD |
| TAK1            | 56             | RAKDVA--IK-----                                                     | 41                                        | VVGRGAF <sup>B</sup> GVV | 103 | VMEY <sup>B</sup> REGGSLYN |
| PfPK9           | 127            | IQT <sup>B</sup> KQKVAL <sup>B</sup> FIPKSN                         | 112                                       | KIGEGGF <sup>A</sup> GCV | 183 | IMEY <sup>B</sup> INGDLKN  |
| ACTIVATION LOOP |                |                                                                     |                                           |                          |     |                            |
| IRAK1           | 256            | GDF <sup>B</sup> GLARFSRFAGSSPSQSSMVARTQTVRG <sup>B</sup> TLAYLPEEY |                                           |                          |     |                            |
| IRAK4           | 330            | SD <sup>B</sup> GLRASEKFAQTVM-----TSRIVG <sup>B</sup> TTAYMAPEA     |                                           |                          |     |                            |
| TAK1            | 174            | CD <sup>B</sup> GTACDIQT-----HMTNNKGSAAWMAPEV                       |                                           |                          |     |                            |
| PfPK9           | 249            | AD <sup>B</sup> GLSDFVNVDQN-----IKTEAG <sup>B</sup> TKAYIAPEI       |                                           |                          |     |                            |

<sup>A</sup> complete homology  
<sup>B</sup> residues of three proteins overlap  
<sup>C</sup> critical H bond residue for Takinib interactions

**Figure S4.** Sequence alignments of IRAK1, IRAK4, TAK1, and PfPK9 related to Figure 1. Sequences of TAK1 that are critical for Takinib binding were aligned with kinases for which Takinib significantly reduced activity in initial screens. Shown are catalytic site, hydrophobic interactions, the hinge region, and the activation loop for each kinase.

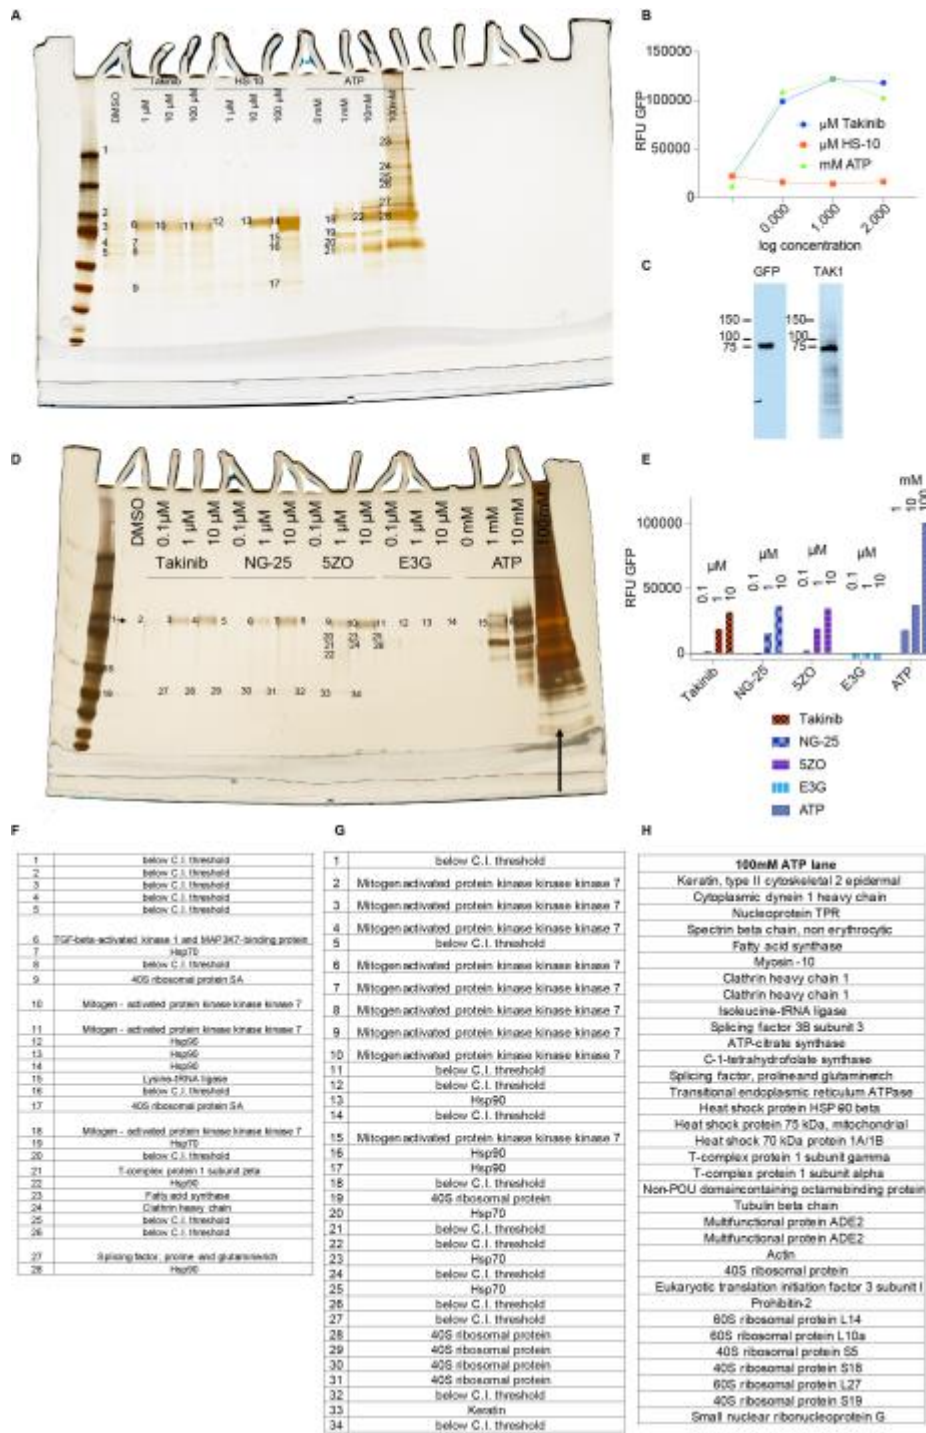

**Figure S5.** Purine-wide selectivity analysis of Takinib in comparison to TAK1 inhibitors related to Figure 1. **A** Silver-stained gel of small-molecule and ATP elutions of  $\gamma$ -linked ATP-sepharose resin from lysate expressing TAK1-TAB1-GFP. HS-10 (selective Hsp90 inhibitor) serves as a control **B** GFP fluorescence measured from elutions in A. **C** TAK1-TAB1-GFP expression determined by Western Blot. **D** As in A, elution profiles of TAK1 inhibitors and ATP, right table displays eluted proteins. Arrow indicates ATP lane sequenced by mass spec **E** GFP fluorescence measured from samples taken from C. **F**, **G**, **H** Tables of proteins identified by mass spec. Complete mass spec analysis shown in Table S3, S4.
